# Supplementary material for: Dexamethasone encapsulated coaxial electrospun PCL/PEO hollow microfibers for inflammation regulation
Source: Royal Society of Chemistry journal article supplement (doi:10.1039/c4ra08358j), 2014-10-07

## Supplementary Materials

### Dexamethasone Encapsulated Coaxial Electrospun PCL/PEO Hollow Microfibers for Inflammation Regulation

Marina Rubert,<sup>a</sup> Yan-fang Li,<sup>a, b</sup> Jeppe Dehli,<sup>a</sup> Mehmet Berat Taskin,<sup>a</sup> Flemming Besenbacher<sup>a</sup> and Menglin Chen<sup>a\*</sup>

**Figure S1.** Laser Scanning Confocal Microscopy images of hollow fibers with BSA-FITC loaded in the PEO solution and NileRed loaded in the PCL solution: a-c) snap images, d-e) z-stack of images followed by z-projection of the sum of all images.

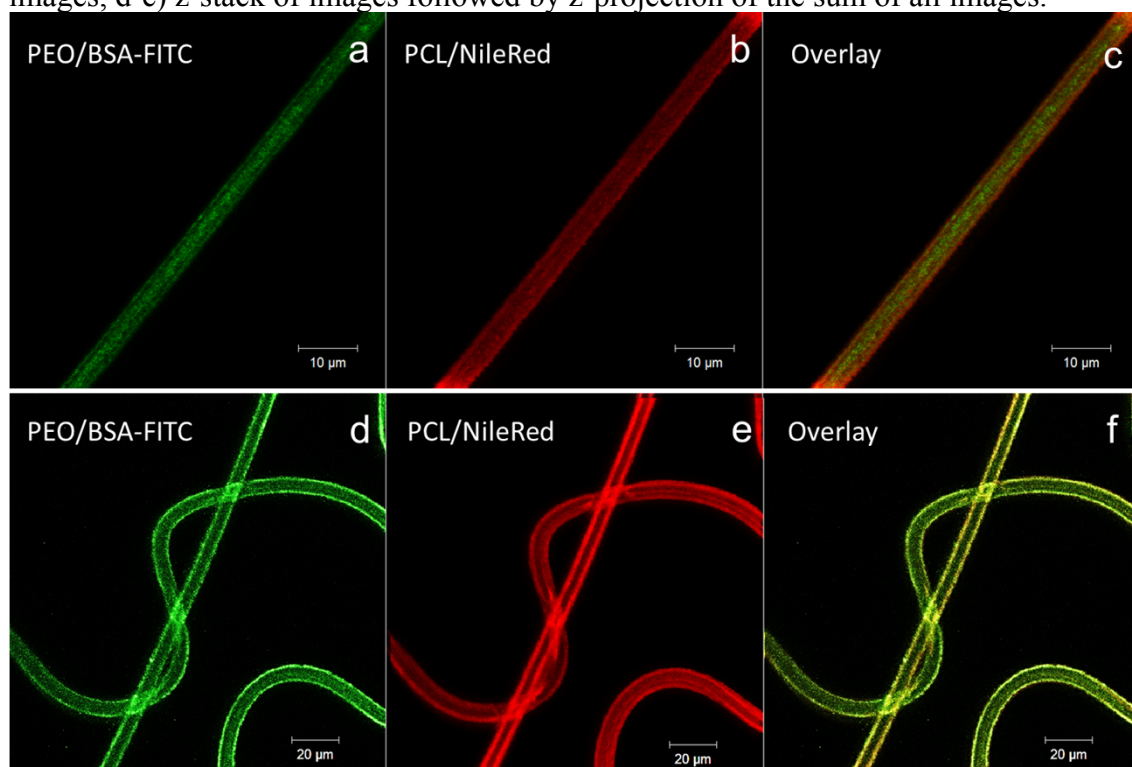

**Figure S2.** LDH activity measured from culture media collected after treatment of RAW 264.7 cells with different dosages of Dex ( $10^{-4}$ M,  $10^{-6}$ M or  $10^{-8}$ M) or/and LPS ( $0.1\mu\text{g}/\text{ml}$ ) for 24 hours. High control (100% cytotoxicity) was cell culture media from cells cultured on TCP and treated with 1 % Triton X-100. Low control (0% cytotoxicity) was cell culture media from cells seeded on TCP. Values represent the mean  $\pm$  SEM. Differences between groups were assessed by Mann-Whitney test:  $p < 0.05$  (\*) versus positive control of inflammation (only LPS treatment); (#) versus negative control of inflammation (only Dex  $10^{-4}$ M treatment).

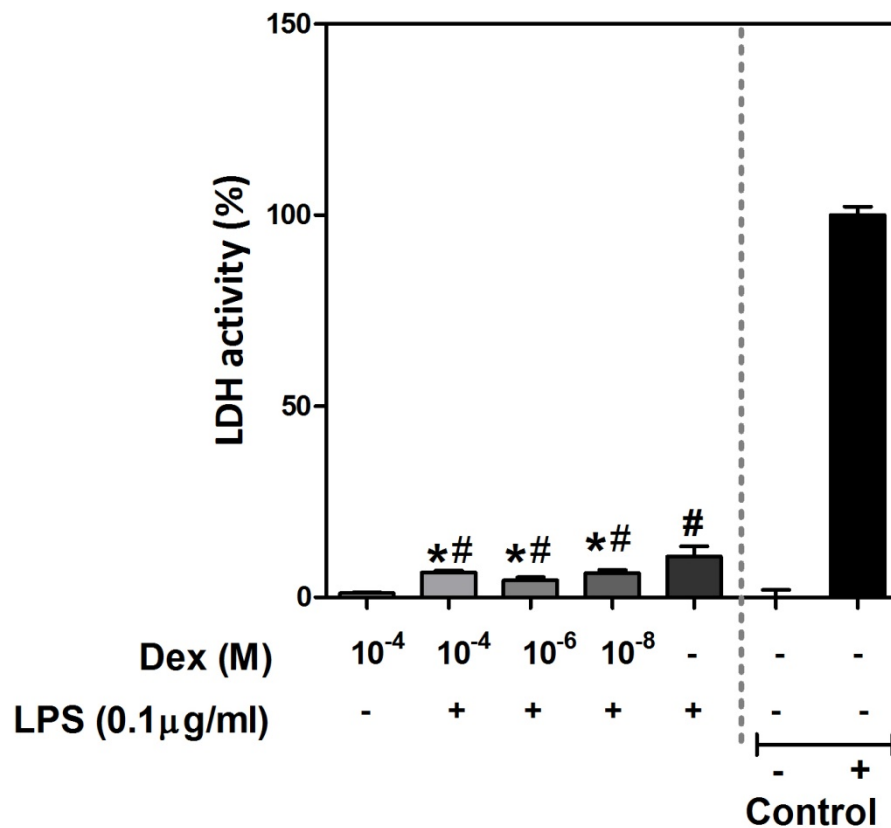

**Figure S3.** Expression of inflammation related genes in RAW 264.7 cells treated with different dosages of Dex (10<sup>-4</sup>M, 10<sup>-6</sup>M or 10<sup>-8</sup>M) or/and LPS (0.1μg/ml) for 24 hours. Data represent relative mRNA levels of target genes normalized with reference genes, expressed as a percentage of negative control of inflammation (only Dex 10<sup>-4</sup>M treatment), which were set to 100%. Values represent the mean ± SEM. Differences between groups were assessed by Mann Whitney test: p<0.05 (\*) versus positive control (only LPS treatment), (#) versus negative control (only Dex 10<sup>-4</sup>M treatment).

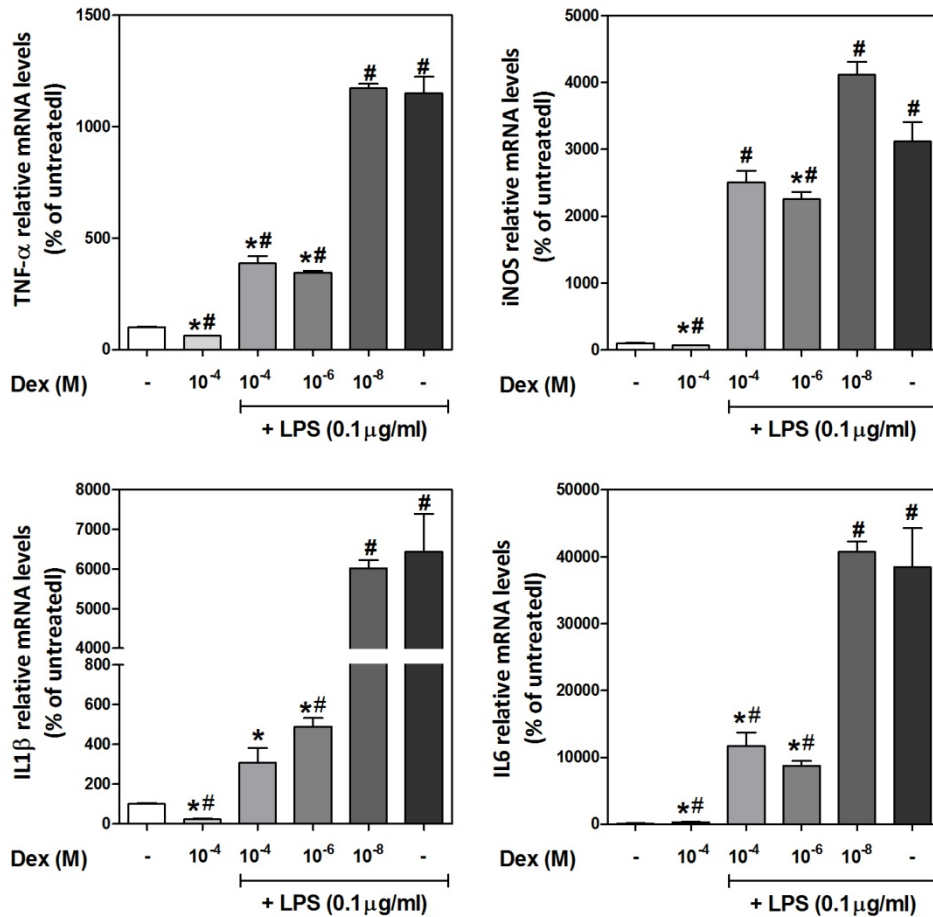

Supplement: c4ra08358j1.pdf [file c4ra08358j1.pdf]
